# Supplementary material
Source: HighWire-hosted journal article supplement (https://bmjopen.bmj.com/content/7/4/e014183)
Supplement: inline-supplementary-material-1 [file inline-supplementary-material-1.pdf]

Supplementary file 1

**Episiotomy 3<sup>rd</sup>/4<sup>th</sup> DEGREE TEARS – PRE WORKSHOP QUESTIONNAIRE Palestine 2015**  
 This is a confidential questionnaire. Please complete and return before course starts.

Name: \_\_\_\_\_

Hospital Address: \_\_\_\_\_

Email: \_\_\_\_\_

**1. How many 2<sup>nd</sup> degree tears or episiotomies have you repaired?**

With supervision: <5  5 – 10  >10   
 Without supervision: <5  5 – 10  >10

1a. What type of episiotomies do you perform? Midline  Mediolateral  Lateral

**2. Do you know which muscles you cut when performing a routine mediolateral episiotomy?**

No  Don't know  yes

If yes, please state.....  
 .....  
 .....

**3. When do you routinely perform a rectal examination?**

Only if 3<sup>rd</sup> degree tear suspected  before suturing  after suturing

**4. Which technique of episiotomy repair do you usually practice?**

|                    | Continuous | Interrupted | Subcuticular |
|--------------------|------------|-------------|--------------|
| Vaginal epithelium |            |             |              |
| Perineal muscles   |            |             |              |
| Perineal skin      |            |             |              |

**5. How would you describe your training at the time of your first unsupervised episiotomy repair?**

Poor  Could be better  Good  Excellent

**6. How do you classify perineal tears? (EAS/IAS = External/Internal anal sphincter)**

| TYPE OF INJURY (Please tick)         | 2 <sup>nd</sup> degree | 3 <sup>rd</sup> degree | 3a | 3b | 3c | 4 <sup>th</sup> degree | Don't know |
|--------------------------------------|------------------------|------------------------|----|----|----|------------------------|------------|
| EAS torn partially (<50% thickness)  |                        |                        |    |    |    |                        |            |
| IAS exposed but not torn             |                        |                        |    |    |    |                        |            |
| EAS exposed only                     |                        |                        |    |    |    |                        |            |
| EAS torn completely (full thickness) |                        |                        |    |    |    |                        |            |
| IAS torn                             |                        |                        |    |    |    |                        |            |
| Rectal mucosa & sphincter torn       |                        |                        |    |    |    |                        |            |

**7. How many 3<sup>rd</sup> / 4<sup>th</sup> degree tears have you repaired to date (rough estimate)?**

None  With supervision:..... Without supervision:.....

**If NONE you do not need to answer any further questions**

**8. What technique do you use for repair of the EAS when it is completely torn?**

End-to-end figure of eight sutures  End-to-end mattress sutures  Overlap

**9. What suture material do you use for repair of the external sphincter?**

Catgut  Vicryl  Dexon  PDS

**10. Do you routinely try to identify the internal anal sphincter?**

Not seen before  Yes  No

**11. If torn, do you repair the internal sphincter separately?**

Don't know  No, together with the EAS  Yes, separately

**12. How many internal sphincters have you repaired?.....**

**13. How would you describe your training at the time of your first unsupervised 3<sup>rd</sup>/4<sup>th</sup> degree tear repair?**

Poor  Could be better  Good  Excellent

**14. Any comments:.....**

.....  
 .....

Thank you
